# Supplementary material for: Design considerations and biomaterials selection in embedded extrusion 3D bioprinting
Source: Royal Society of Chemistry journal article supplement (doi:10.1039/d4bm00550c), 2024-01-01
Supplement: d4bm00550c1.xlsx [file d4bm00550c1.xlsx]

## Sheet: Raw Data
																																												β=cref/c (lowest concentration/c)	1
Vertical shift factor	β=cref/c (lowest concentration/c)	1	reference concentration is the lowest (5% for GelMA)															β=cref/c (lowest concentration/c)	0.714286											β=cref/c (lowest concentration/c)	0.5													𝝰=120s/t	6	2.4	1.5	1	reference blending time is 120s
Horizonal shift factor	𝝰=120s/t	6	2.4	1.5	1	reference blending time is 120s											Horizonal shift factor	𝝰=120s/t	6	2.4	1.5	1	reference blending time is 120s							𝝰=120s/t	6	2.4	1.5	1	reference blending time is 120s								shear rate x shift factor	Shear	20s	50s	80s	120s	20s-2%Ag
shear rate x shift factor	1/s	20s	50s	80s	120s	20s-5%G	50s-5%G	80s-5%G	120s-5%G								shear rate x shift factor	Shear rate 1/s	20s	50s	80s	120s	20s-7%G	50s-7%G	80s-7%G	120s-7%G			shear rate x shift factor	1/s	20s	80s	50s	120s	20s-10%G	50s-10%G	80s-10%G	120s-10%G					0.060138	0.010023	4012.58				4012.58
0.0599249	0.00998748	509.712				509.712											0.0599245	0.00998741	11901.4				8501						0.0596663	0.00994438	25175.1				12587.5								0.095079	0.0158465	2065.54				2065.54
0.0951498	0.0158583	602.798				602.798											0.0951246	0.0158541	9432.04				6737.17						0.0950004	0.0158334	30571.7				15285.9								0.150782	0.0251303	1290.03				1290.03
0.150715	0.0251191	407.305				407.305											0.15071	0.0251184	5351.3				3822.36						0.150655	0.0251092	19341.8				9670.9								0.238941	0.0398235	814.119				814.119
0.239002	0.0398337	260.468				260.468											0.238861	0.0398102	3067.42				2191.01						0.238796	0.0397994	11804.2				5902.1								0.378554	0.0630924	523.353				523.353
0.378563	0.0630938	166.486				166.486											0.378566	0.0630943	1870.94				1336.39						0.378628	0.0631047	7077.84				3538.92								0.600042	0.100007	340.975				340.975
0.6	0.1	97.7769				97.7769											0.599954	0.0999923	1224.36				874.543						0.60006	0.10001	4171.25				2085.62								0.950838	0.158473	221.737				221.737
0.950808	0.158468	53.9444				53.9444											0.951174	0.158529	826.425				590.304						0.951	0.1585	2431.09				1215.55								1.50705	0.251175	145.673				145.673
1.50716	0.251193	29.2691				29.2691											1.50712	0.251186	568.723				406.231						1.5071	0.251184	1501.48				750.74								2.38859	0.398098	98.4142				98.4142
2.38868	0.398114	16.3171				16.3171											2.38871	0.398119	389.959				278.542						2.38853	0.398088	1029.14				514.57								3.7857	0.63095	69.2292				69.2292
3.78586	0.630977	8.89471				8.89471											3.78586	0.630977	264.063				188.616						3.78572	0.630953	706.707				353.353								5.99991	0.999985	50.3117				50.3117
6.00024	1.00004	4.98226				4.98226											6.00006	1.00001	176.068				125.763						5.99992	0.999986	486.411				243.206								9.50916	1.58486	37.1838				37.1838
9.5097	1.58495	3.3518				3.3518											9.50946	1.58491	113.216				80.8686						9.5094	1.5849	339.884				169.942								15.0711	2.51185	29.1355				29.1355
15.0718	2.51196	2.39657				2.39657											15.0716	2.51194	67.5655				48.2611						15.0716	2.51193	194.057				97.0285								23.8861	3.98101	22.2847				22.2847
23.8874	3.98123	1.44331				1.44331											23.8869	3.98115	36.6864				26.2046						23.8865	3.98109	95.1029				47.5515								37.8571	6.30951	17.0833				17.0833
37.8584	6.30973	1.13157				1.13157											37.8582	6.3097	18.821				13.4436						37.8577	6.30962	44.0428				22.0214								59.9995	9.99991	13.3233				13.3233
60.0018	10.0003	0.832361				0.832361											60.0012	10.0002	9.3289				6.6635						59.9997	9.99995	15.8767				7.93835								95.0922	15.8487	9.7653				9.7653
95.0964	15.8494	0.689343				0.689343											95.0946	15.8491	4.87181				3.47986						95.0922	15.8487	5.92438				2.96219								150.712	25.1187	6.73652				6.73652
150.719	25.1198	0.555779				0.555779											150.715	25.1192	2.95037				2.10741						150.711	25.1185	2.93201				1.46601								238.863	39.8105	4.53923				4.53923
238.871	39.8119	0.439122				0.439122											238.867	39.8111	1.92879				1.37771						238.862	39.8103	1.67004				0.83502								378.568	63.0946	3.02902				3.02902
378.583	63.0971	0.352886				0.352886											378.578	63.0964	1.33045				0.950321						378.568	63.0946	1.03831				0.519155								599.989	99.9981	2.01894				2.01894
600.018	100.003	0.29139				0.29139											600.006	100.001	0.962062				0.687187						599.992	99.9987	0.68859				0.344295								0.0601356	0.0100226		3242.48
0.0600066	0.0100011		602.955				602.955										0.0600066	0.0100011		2450.45				1750.32					0.0598162	0.00996937		15315.9				7657.95							0.0950556	0.0158426		1624.36
0.095043	0.0158405		871.736				871.736										0.095043	0.0158405		2115.04				1510.74					0.0951546	0.0158591		13651.5				6825.75							0.150727	0.0251212		1001.19
0.150745	0.0251241		549.608				549.608										0.150745	0.0251241		1378.62				984.729					0.150732	0.025122		7589.4				3794.7							0.238868	0.0398113		633.594
0.238892	0.0398154		345.545				345.545										0.238892	0.0398154		908.941				649.244					0.238972	0.0398287		4542.49				2271.24							0.378529	0.0630881		404.416
0.378625	0.0631041		221.395				221.395										0.378625	0.0631041		578.839				413.456					0.378664	0.0631106		2674.47				1337.23							0.600006	0.100001		264.368
0.599961	0.0999935		142.175				142.175										0.599961	0.0999935		367.68				262.629					0.599969	0.0999948		1626.86				813.43							0.950928	0.158488		173.452
0.950958	0.158493		90.9942				90.9942										0.950958	0.158493		228.26				163.043					0.950952	0.158492		1094.84				547.42							1.50707	0.251179		115.978
1.50713	0.251189		57.6338				57.6338										1.50713	0.251189		138.027				98.5907					1.50706	0.251177		748.472				374.236							2.38864	0.398106		79.1368
2.38864	0.398107		34.3518				34.3518										2.38864	0.398107		82.846				59.1757					2.38871	0.398119		513.529				256.764							3.78569	0.630949		55.6411
3.78566	0.630943		19.771				19.771										3.78566	0.630943		48.2543				34.4674					3.78581	0.630969		344.048				172.024							5.99992	0.999987		40.299
6	1		10.7591				10.7591										6	1		23.4541				16.7529					6.0003	1.00005		221.769				110.885							9.50934	1.58489		30.6921
9.50946	1.58491		5.93419				5.93419										9.50946	1.58491		10.9146				7.79614					9.50976	1.58496		130.059				65.0295							15.0712	2.51187		24.1746
15.0712	2.51187		3.62299				3.62299										15.0712	2.51187		6.738				4.81286					15.0718	2.51196		67.1367				33.5684							23.8864	3.98106		18.8375
23.8862	3.98103		2.40414				2.40414										23.8862	3.98103		4.41191				3.15136					23.8869	3.98115		30.5312				15.2656							37.8572	6.30954		14.0706
37.8574	6.30956		1.7434				1.7434										37.8574	6.30956		3.15548				2.25391					37.858	6.30967		13.4145				6.70725							59.9998	9.99996		10.2456
59.9998	9.99996		1.32746				1.32746										59.9998	9.99996		2.38567				1.70405					60.0012	10.0002		6.66608				3.33304							95.094	15.849		7.21531
95.0934	15.8489		1.06335				1.06335										95.0934	15.8489		1.74201				1.24429					95.0952	15.8492		3.75117				1.87559							150.713	25.1188		4.90597
150.712	25.1187		1.02262				1.02262										150.712	25.1187		1.36511				0.975079					150.717	25.1195		2.31785				1.15892							238.862	39.8103		3.27906
238.864	39.8107		1.12635				1.12635										238.864	39.8107		1.02562				0.732586					238.869	39.8115		1.53117				0.765585							378.571	63.0952		2.18924
378.573	63.0955		0.93332				0.93332										378.573	63.0955		0.775191				0.553708					378.582	63.097		1.06844				0.53422							599.992	99.9987		1.46923
599.997	99.9995		0.608546				0.608546										599.997	99.9995		0.597359				0.426685					600.012	100.002		0.774603				0.387302							0.0601506	0.0100251			2951.05
0.0598902	0.0099817			2718.74				2718.74									0.0599732	0.00999554			5244.19				3745.85				0.0596747	0.00994578			24792.5				12396.2						0.0950898	0.0158483			1476.63
0.0952116	0.0158686			2806.47				2806.47									0.0951162	0.0158527			4566.51				3261.79				0.0950748	0.0158458			27234.5				13617.2						0.150688	0.0251147			893.587
0.150676	0.0251127			1367.37				1367.37									0.150724	0.0251207			3019.87				2157.05				0.15068	0.0251133			17094.6				8547.3						0.238978	0.0398296			555.501
0.238836	0.039806			816.052				816.052									0.2389	0.0398167			2008.05				1434.32				0.23894	0.0398233			10618.3				5309.15						0.378611	0.0631018			352.911
0.378601	0.0631002			520.344				520.344									0.37855	0.0630917			1301.98				929.986				0.378584	0.0630974			6398.43				3199.22						0.600018	0.100003			227.983
0.6	0.1			338.37				338.37									0.599951	0.0999918			840.001				600.001				0.599827	0.0999712			3657.16				1828.58						0.950982	0.158497			149.419
0.951216	0.158536			218.98				218.98									0.950898	0.158483			528.848				377.749				0.951102	0.158517			2180.6				1090.3						1.50713	0.251189			99.8733
1.50714	0.25119			138.913				138.913									1.50707	0.251178			325.935				232.811				1.50709	0.251181			1364.45				682.225						2.38865	0.398108			68.1896
2.38869	0.398115			83.7292				83.7292									2.38859	0.398099			209.134				149.381				2.38858	0.398096			909.917				454.959						3.78569	0.630948			47.48
3.78577	0.630961			49.101				49.101									3.7857	0.63095			131.219				93.7279				3.78567	0.630945			609.986				304.993						6.00018	1.00003			34.083
6.00006	1.00001			26.9066				26.9066									5.9999	0.999983			70.4891				50.3494				6.00024	1.00004			408.714				204.357						9.50934	1.58489			25.6765
9.50946	1.58491			13.7821				13.7821									9.50922	1.58487			37.2658				26.6184				9.5088	1.5848			269.527				134.763						15.0714	2.5119			20.0288
15.0715	2.51191			7.26331				7.26331									15.0709	2.51181			23.3878				16.7056				15.0712	2.51186			171.31				85.655						23.8865	3.98109			14.813
23.8866	3.9811			4.15863				4.15863									23.8858	3.98097			17.7693				12.6924				23.8861	3.98101			104.379				52.1895						37.8577	6.30961			11.4103
37.8576	6.3096			2.59788				2.59788									37.8565	6.30942			11.9877				8.56264				37.8569	6.30948			58.8504				29.4252						60	10			8.33525
60.0006	10.0001			1.70737				1.70737									59.999	9.99983			7.93094				5.66496				59.9989	9.99982			30.6143				15.3072						95.094	15.849			5.89075
95.094	15.849			1.20142				1.20142									95.0922	15.8487			5.76876				4.12054				95.0922	15.8487			15.4365				7.71825						150.714	25.119			4.06634
150.714	25.119			0.893959				0.893959									150.71	25.1184			4.50399				3.21714				150.71	25.1183			8.39747				4.19874						238.865	39.8108			2.74094
238.867	39.8111			0.673933				0.673933									238.861	39.8101			3.26343				2.33102				238.859	39.8098			4.84652				2.42326						378.574	63.0957			1.84187
378.574	63.0956			0.559784				0.559784									378.565	63.0942			2.32931				1.66379				378.569	63.0948			2.89499				1.44749						600	100			1.24463
599.992	99.9987			0.668596				0.668596									599.983	99.9972			1.79225				1.28018				599.989	99.9981			1.8138				0.9069						0.0601602	0.0100267				2004.8
0.0598938	0.0099823				0.370595				0.370595								0.0599356	0.00998927				0.370595				0.264711			0.0597706	0.00996176				12542.5				6271.25					0.09516	0.01586				987.029
0.095079	0.0158465				0.494208				0.494208								0.0951864	0.0158644				0.494208				0.353006			0.0951198	0.0158533				15018.9				7509.45					0.15068	0.0251133				599.935
0.150694	0.0251156				0.551633				0.551633								0.150712	0.0251187				0.551633				0.394024			0.150667	0.0251112				8675.94				4337.97					0.238897	0.0398161				375.964
0.238933	0.0398222				0.53985				0.53985								0.238868	0.0398114				0.53985				0.385607			0.238811	0.0398018				4718.91				2359.45					0.378669	0.0631115				240.168
0.378614	0.0631024				0.394193				0.394193								0.378591	0.0630985				0.394193				0.281566			0.378629	0.0631048				2604.26				1302.13					0.600042	0.100007				154.405
0.6	0.1				0.281556				0.281556								0.599927	0.0999878				0.281556				0.201111			0.6	0.1				1538.46				769.23					0.950958	0.158493				101.673
0.95094	0.15849				0.0926528				0.0926528								0.950844	0.158474				0.0926528				0.0661806			0.950982	0.158497				1014.94				507.47					1.50715	0.251191				68.7364
1.50715	0.251192				0.11644				0.11644								1.50704	0.251174				0.11644				0.0831714			1.50711	0.251185				671.748				335.874					2.3887	0.398116				47.055
2.38856	0.398094				0.155087				0.155087								2.38852	0.398087				0.155087				0.110776			2.38862	0.398103				466.36				233.18					3.78583	0.630972				33.4641
3.78582	0.63097				0.120537				0.120537								3.78562	0.630937				0.120537				0.0860979			3.78581	0.630969				312.947				156.474					6.00006	1.00001				24.6472
5.99999	0.999999				0.114722				0.114722								5.99979	0.999965				0.114722				0.0819443			6.00012	1.00002				208.592				104.296					9.50952	1.58492				18.6761
9.5094	1.5849				0.113189				0.113189								9.50892	1.58482				0.113189				0.0808493			9.50958	1.58493				133.868				66.934					15.0716	2.51193				14.7076
15.0715	2.51191				0.108516				0.108516								15.0707	2.51178				0.108516				0.0775114			15.0717	2.51195				80.1829				40.0915					23.8868	3.98113				12.1862
23.8865	3.98108				0.104296				0.104296								23.8853	3.98089				0.104296				0.0744971			23.8872	3.9812				43.8631				21.9316					37.8582	6.3097				10.0592
37.8576	6.3096				0.101043				0.101043								37.8555	6.30925				0.101043				0.0721736			37.8587	6.30978				20.5636				10.2818					60.0012	10.0002				7.22624
60.0006	10.0001				0.0976443				0.0976443								59.9976	9.9996				0.0976443				0.0697459			60.0012	10.0002				9.47128				4.73564					95.0946	15.8491				5.06095
95.0934	15.8489				0.0945212				0.0945212								95.0892	15.8482				0.0945212				0.0675151			95.0958	15.8493				5.00102				2.50051					150.715	25.1192				3.45607
150.712	25.1186				0.0911029				0.0911029								150.706	25.1176				0.0911029				0.0650735			150.716	25.1194				3.07509				1.53754					238.867	39.8111				2.32365
238.864	39.8106				0.087357				0.087357								238.853	39.8088				0.087357				0.0623979			238.869	39.8115				2.03988				1.01994					378.579	63.0965				1.55462
378.577	63.0962				0.0832165				0.0832165								378.557	63.0928				0.0832165				0.0594404			378.581	63.0969				1.42863				0.714315					600.006	100.001				1.04975
600.006	100.001				0.078796				0.078796								599.975	99.9959				0.078796				0.0562829			600.012	100.002				1.02464				0.51232
[truncated: 23 more columns]

## Sheet: Analysis
5% GelMA Slurry				7% GelMA Slurry				10% GelMA Slurry
Blend time (s)	Viscosity Coefficient (Pa.s)	Power Law Index (n)		Blend time (s)	Viscosity Coefficient (Pa.s)	Power Law Index (n)		Blend time (s)	Viscosity Coefficient (Pa.s)	Power Law Index (n)
20s	111.092	-1.9901		20s	176.068	-0.9516		20s	176.068	-0.9516
50s	26.9066	-1.1213		50s	114.722	-0.8871		50s	114.722	-0.8871
80s	10.7591	-1.0991		80s	70.4891	-0.8667		80s	70.4891	-0.8667
120s	4.98226	-0.8421		120s	23.4541	-0.7332		120s	23.4541	-0.7332
2% Agarose Slurry				3% Agarose Slurry				4% Agarose Slurry
Blend time (s)	Viscosity Coefficient (Pa.s)	Power Law Index (n)		Blend time (s)	Viscosity Coefficient (Pa.s)	Power Law Index (n)		Blend time (s)	Viscosity Coefficient (Pa.s)	Power Law Index (n)
20s	50.3177	-0.831		20s	223.218	-0.7564		20s	223.218	-0.7564
50s	40.299	-0.8169		50s	112.42	-0.7269		50s	112.42	-0.7269
80s	34.083	-0.8112		80s	108.622	-0.7162		80s	108.622	-0.7162
120s	24.6472	-0.8076		120s	87.8166	-0.6704		120s	87.8166	-0.6704
